# Supplementary material for: Hierarchical CdS nanostructure by Lawesson's reagent and its enhanced photocatalytic hydrogen production
Source: Royal Society of Chemistry journal article supplement (doi:10.1039/c4ra15138k), 2015-01-01
Supplement: c4ra15138k1.pdf [file c4ra15138k1.pdf]

*Supporting Information for*

## **Hierarchical CdS Nanostructure by Lawesson's Reagent and its Enhanced Photocatalytic Hydrogen Production**

Vikram U. Pandit,<sup>a</sup> Sudhir S. Arbuj,<sup>a</sup> Ranjit R. Hawaldar,<sup>a</sup> Pradnya V. Kshirsagar,<sup>a</sup> Amarsinh J. Deshmukh,<sup>b</sup> Jalindar D. Ambekar,<sup>a</sup> Uttam P. Mulik,<sup>a</sup> Suresh W. Gosavi,<sup>c</sup> Bharat B. Kale\*<sup>a</sup>

<sup>a</sup>Centre for Materials for Electronic Technology (C-MET), Govt of India, Panchawati, Off Pashan Road, Pune 411008, India. E-mail: [kbbb1@yahoo.com](mailto:kbbb1@yahoo.com), [bbkale@cmet.gov.in](mailto:bbkale@cmet.gov.in); Fax: +91-20-25898085; Tel: +91-20-25898390

<sup>b</sup>National Chemical Laboratory (NCL), Dr. Homi Bhabha Road, Pune-411008, India

<sup>c</sup>Department of Physics, University of Pune, Pune-411007, India

## S1 : Photoreaction Set up

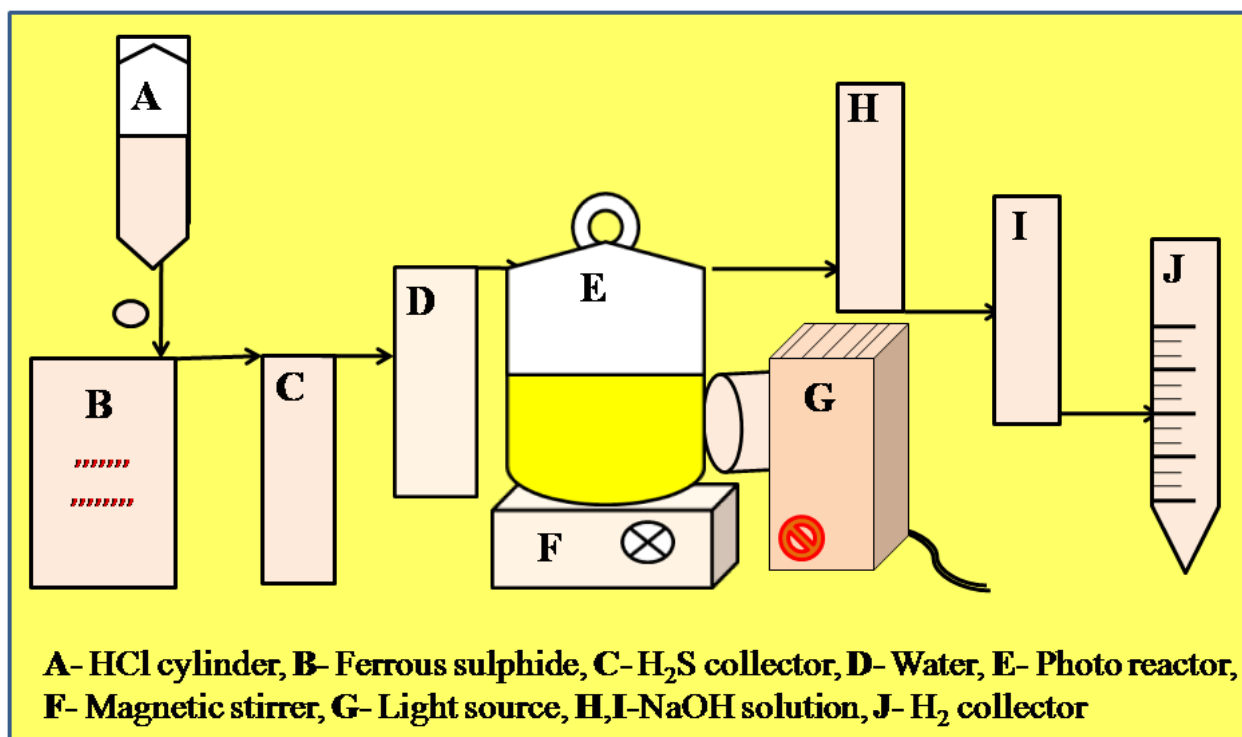

Fig. S1 Schematic representation of H<sub>2</sub>S splitting setup.

**S2 : TEM of the CdS Nanostructures**

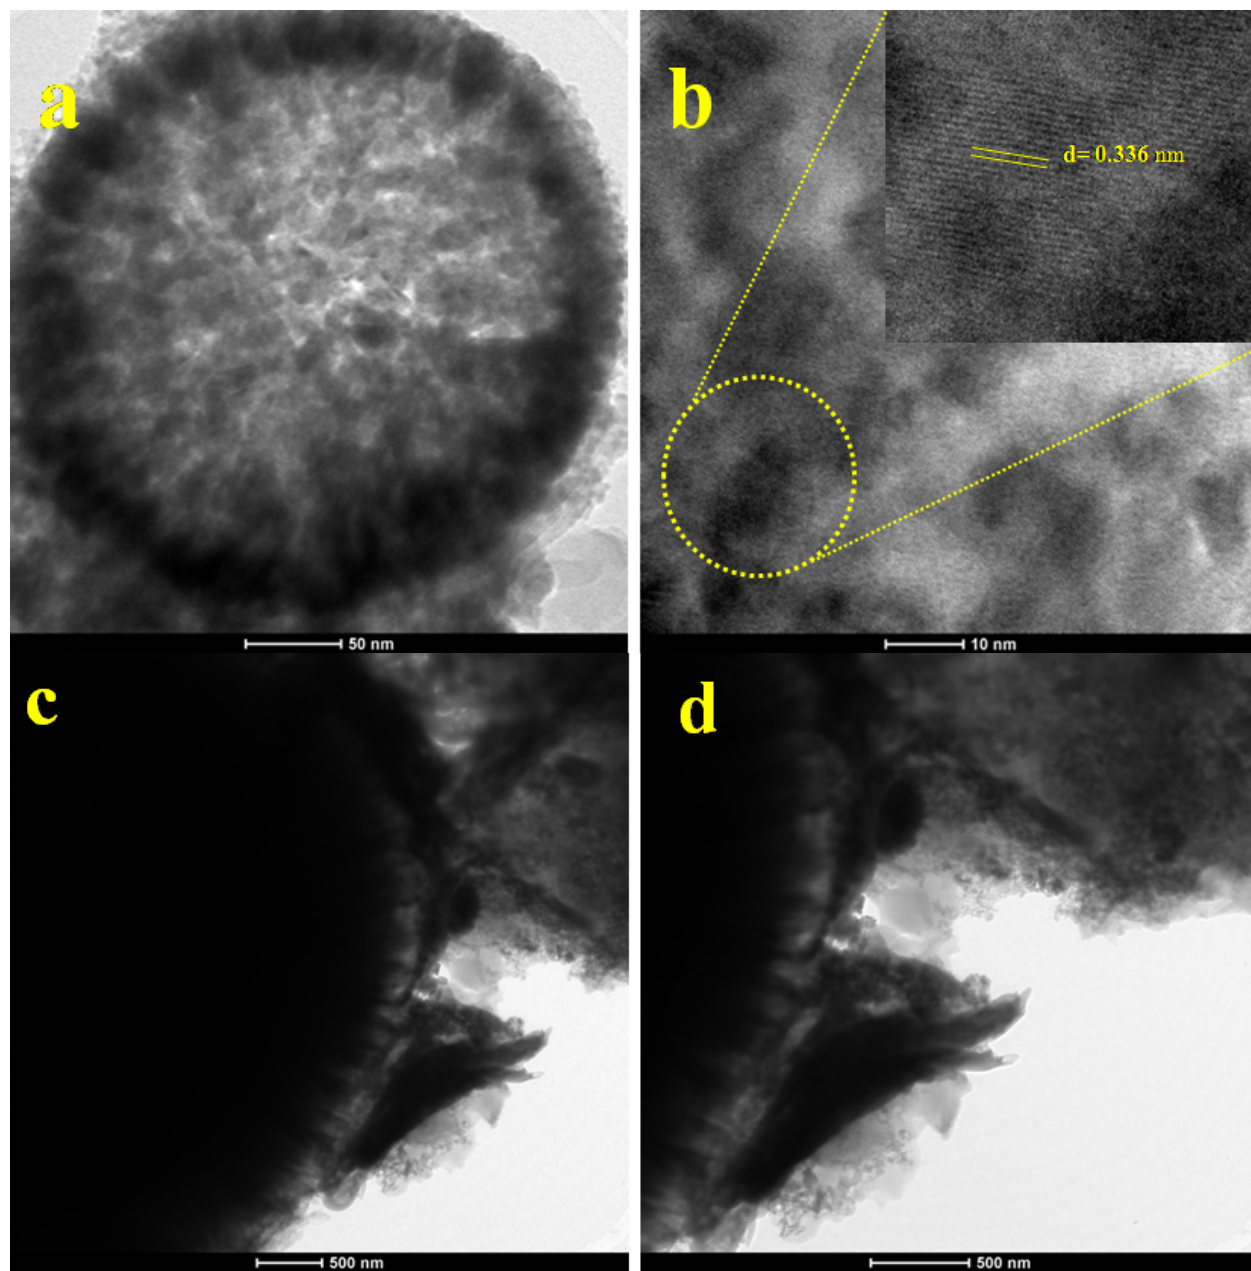

**Fig. S2.** TEM images a, b) CdS nanostructures and c, d) Pt loaded CdS nanostructures.

**Scheme S1: Reaction mechanism**

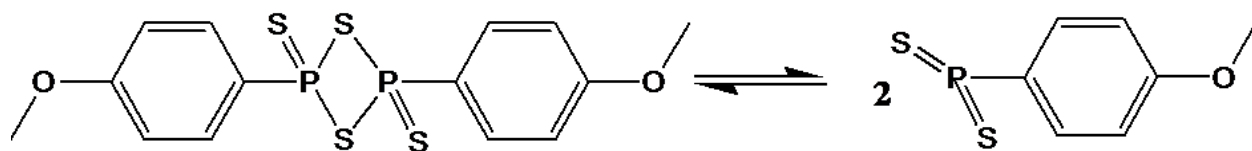

**Scheme S1.** Formation mechanism for monomer (B).

### S3 : NMR of products

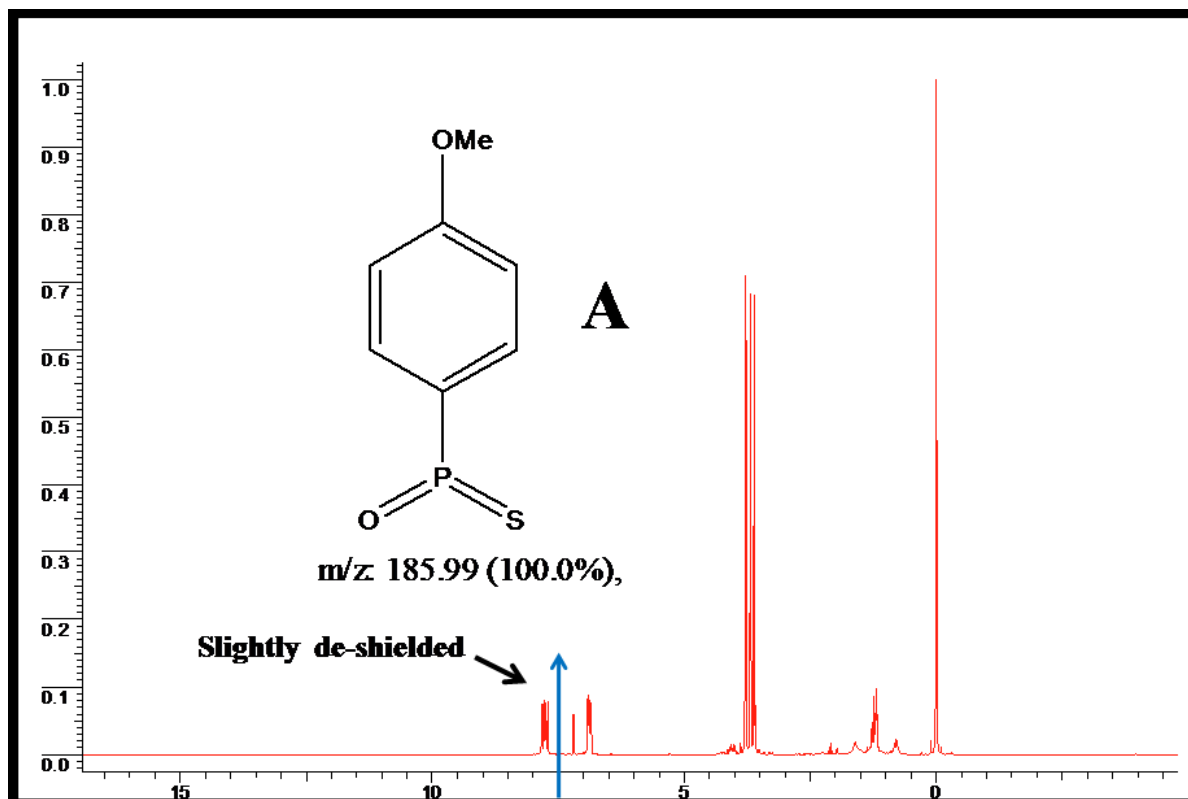

Fig. S3  $^1\text{H}$  NMR spectrum for side product (A).

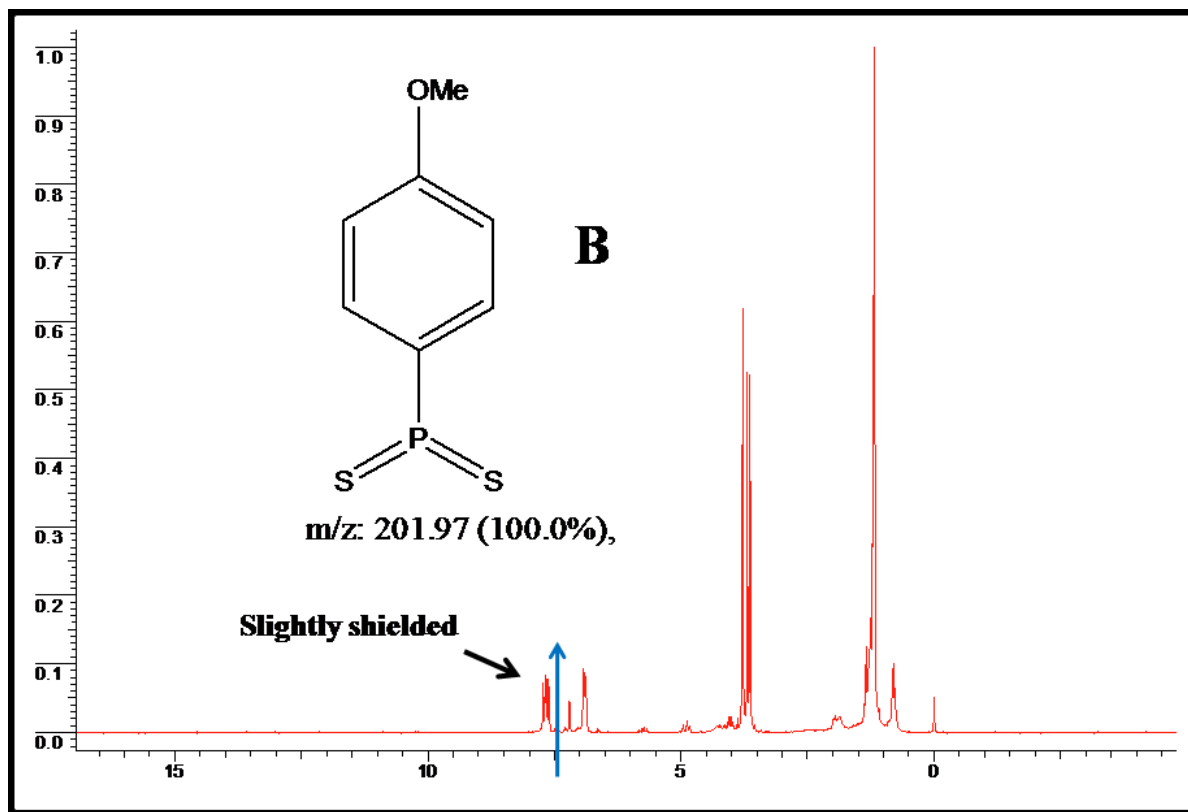

Fig. S4  $^1\text{H}$  NMR spectrum for side product (B).

**Table S1** Comparison of CdS nanostructures with the earlier reports for H<sub>2</sub> generation from H<sub>2</sub>S

| <b>Photocatalyst</b>                       | <b>Amount of Photocatalyst [gram]</b> | <b>Amount of H<sub>2</sub> generation [<math>\mu</math>mol/h/g]</b> | <b>Reference No.</b> |
|--------------------------------------------|---------------------------------------|---------------------------------------------------------------------|----------------------|
| CdIn <sub>2</sub> S <sub>4</sub>           | 0.5                                   | 3,480.00                                                            | 17                   |
| CdS                                        | 0.5                                   | 5,898.00                                                            | 18                   |
| CdS <sub>0.5</sub> Se <sub>0.5</sub> /CdSe | 1.0                                   | 8,164.53                                                            | 19                   |
| Bi-GeO <sub>2</sub>                        | 1.0                                   | 11,541.00                                                           | 21                   |
| CdS-GeO <sub>2</sub>                       | 0.5                                   | 7,560.00                                                            | 22                   |
| ZnIn <sub>2</sub> S <sub>4</sub>           | 0.5                                   | 5287.00                                                             | 23                   |
| ZnS                                        | 1.0                                   | 2050.00                                                             | 24                   |
| CdS-Glass                                  | 1.0                                   | 3,570.00                                                            | 25                   |
| N-TiO <sub>2</sub>                         | 1.0                                   | 8800.00                                                             | 26                   |
| <b>CdS</b>                                 | <b>0.1</b>                            | <b>14,136.00</b>                                                    | <b>Present Work</b>  |

**Table S2** Recycle study of CdS nanostructures for H<sub>2</sub> generation from H<sub>2</sub>S

| Sr. No. | No. of Cycle        | H <sub>2</sub> production in $\mu\text{mol/h/gm}$ |
|---------|---------------------|---------------------------------------------------|
| 1       | 1 <sup>st</sup> run | 14,136                                            |
| 2       | 2 <sup>nd</sup> run | 13,824                                            |
| 3       | 3 <sup>rd</sup> run | 13,589                                            |
